# Supplementary material for: A multiomics signature highlights alterations underlying homologous recombination deficiency in triple-negative breast cancer
Source: Research Square preprint supplement (doi:10.21203/rs.3.rs-1244930/v1), 2022-01-18
Supplement: Supplementary file 1 [file 61f8211b885a44d60d0ca575.pdf]

## Supplementary Materials

### Definition of radiomics features

Table. Feature categories used in this study.

| Feature classes        | Representative features                                                         |
|------------------------|---------------------------------------------------------------------------------|
| Shape-based            | Voxel Volume, Surface Area, Sphericity, ....                                    |
| First Order Statistics | Energy, Entropy, Mean, ....                                                     |
| GLCM                   | Autocorrelation, Joint Average, Cluster Shade, ....                             |
| GLDM                   | Small Dependence Emphasis, Large Dependence Emphasis, Dependence Non-Uniformity |
| GLRLM                  | Short Run Emphasis, Long Run Emphasis, Run Length Non-Uniformity, ....          |
| GLSZM                  | Small Area Emphasis, Large Area Emphasis, Size-Zone Non-Uniformity, ....        |
| NGTDM                  | Coarseness, Contrast, Complexity, ....                                          |
| Wavelet                | -                                                                               |
| Sequential features    | -                                                                               |

GLCM = Gray Level Co-occurrence Matrix, GLDM = Gray Level Dependence Matrix, GLRLM = Gray Level Run Length Matrix, GLSZM = Gray Level Size Zone Matrix, NGTDM = Neighboring Gray Tone Difference Matrix.

### I. Spatial domain features

Spatial domain features comprise Shape-based, First Order Statistics, texture

(GLCM, GLDM, GLRLM, GLSZM, NGTDM) features. Definition of these features was listed elsewhere (<https://pyradiomics.readthedocs.io/en/latest/features.html>). Wavelet features were extracted for each first order features and texture features after applying wavelet filtering to the original images, yielding 8 decompositions per level (LLL, LLH, LHL, HLL, LHH, HLH, HHL, HHH).

## II. Sequential features

Sequential features were mainly composed of two parts, including the rate of enhancement of features and some time-varying curve based features. Sequential features were extracted based each spatial domain feature except for the common shape features. Here  $dyn_0$ ,  $dyn_1$ ,  $dyn_2$  and  $dyn_3$  represent the mask phase, first enhanced phase, second enhanced phase and third enhanced phase, respectively.

### Feature enhancement rate

Feature enhancement rate is the rate of change of features between each two phases during contrast enhancement, which is defined as:

$$Enh(dyn_i, dyn_j) = \frac{dyn_j - dyn_i}{dyn_i}$$

here  $DYN_i$  represents the feature value of the former phase, and  $DYN_j$  represents the feature value of the later phase.  $Enh(dyn_0, dyn_1)$ ,  $Enh(dyn_1, dyn_2)$ ,  $Enh(dyn_2, dyn_3)$ ,  $Enh(dyn_0, dyn_3)$  were calculated in this study (totally 3348 features).

### Time-varying curve based features

Time-varying curve based features indicate the mean, variance, skewness,

kurtosis and entropy of the time-varying curves (totally 3348 features).

1. Mean

$$mean(DYN = [dyn_1...dyn_N]) = \frac{1}{N} \sum_{i=1}^N dyn_i$$

2. Variance

$$variance(DYN = [dyn_1...dyn_N]) = \frac{1}{N-1} \sum_{i=1}^N (dyn_i - \overline{DYN})^2$$

3. Skewness

$$skewness(DYN = [dyn_1...dyn_N]) = \frac{1}{N} \sum_{i=1}^N \left[ \frac{dyn_i - \overline{DYN}}{\sigma} \right]^3$$

4. Kurtosis

$$kurtosis(DYN = [dyn_1...dyn_N]) = \left\{ \frac{1}{N} \sum_{i=1}^N \left[ \frac{dyn_i - \overline{DYN}}{\sigma} \right]^4 \right\} - 3$$

here  $N = 4$  corresponds to 4 DCE phases,  $\sigma = \sqrt{Var(dyn_1...dyn_N)}$  is the distribution's standard deviation.
